# Supplementary material for: A dual-functional microfluidic chip for guiding personalized lung cancer medicine: combining EGFR mutation detection and organoid-based drug response test
Source: Royal Society of Chemistry journal article supplement (doi:10.1039/d3lc00974b), 2024-01-01
Supplement: d3lc00974b1.pdf [file d3lc00974b1.pdf]

## Supplementary Information

### A dual-functional microfluidic chip for guiding personalized lung cancer medicine: combining EGFR mutation detection and organoid-based drug response test

*Kexin Zhang<sup>1#</sup>, Jiyu Xi<sup>1#</sup>, Huiting Zhao<sup>1</sup>, Yadong Wang<sup>2,3</sup>, Jianchao Xue<sup>2,3</sup>, Naixin Liang<sup>2</sup>, Zewen Wei<sup>1\*</sup>*

1 Department of Biomedical Engineering, School of Medical Technology, Beijing Institute of Technology, Beijing 100081, China.

2 Department of Thoracic Surgery, Peking Union Medical College Hospital, Chinese Academy of Medical Sciences and Peking Union Medical College, Beijing 100730, China.

3 Chinese Academy of Medical Sciences and Peking Union Medical College, Beijing 100730, China.

# K.Z. and J.X. contributed equally to this work.

\*Correspondence should be addressed to Zewen Wei (weizewen@bit.edu.cn).

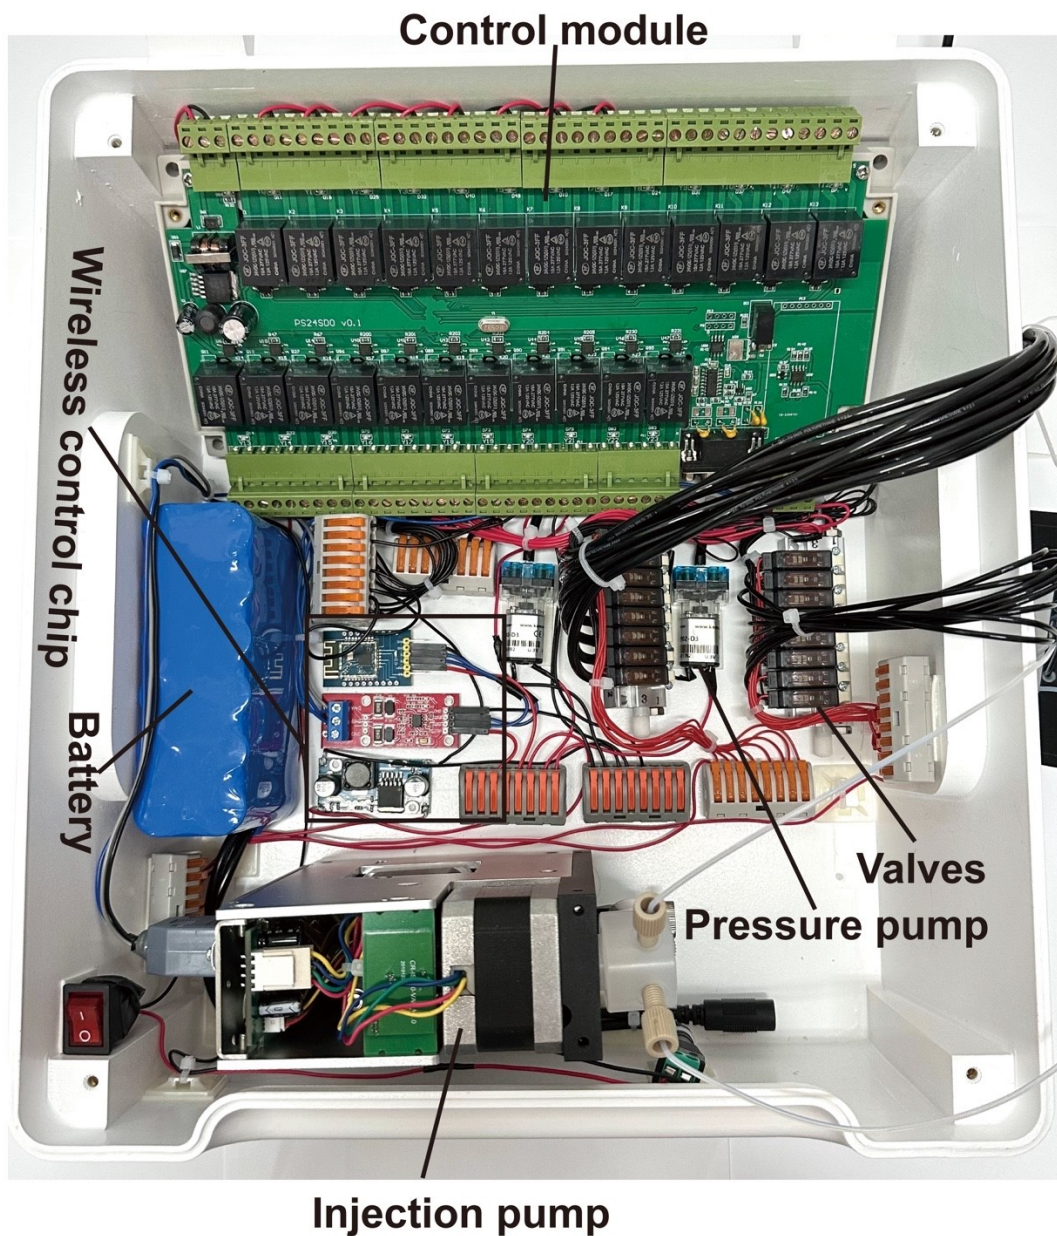

**Fig. S1.** Detailed interior structure of the RDMO-System. Associated control/communication modules consist of wireless communication & control circuits, valves, pumps and battery. In detail, the wireless communication & control circuit contains a Bluetooth chip, a RS232/RS485 chip, and a DC/DC chip. The 2 eight-channel solenoid valves controlled by pressure pump are used for facilitating liquid/gas transportation and regulating flow rates. The injection pump ensures the dynamic fluidic flow on the RDMO-System.

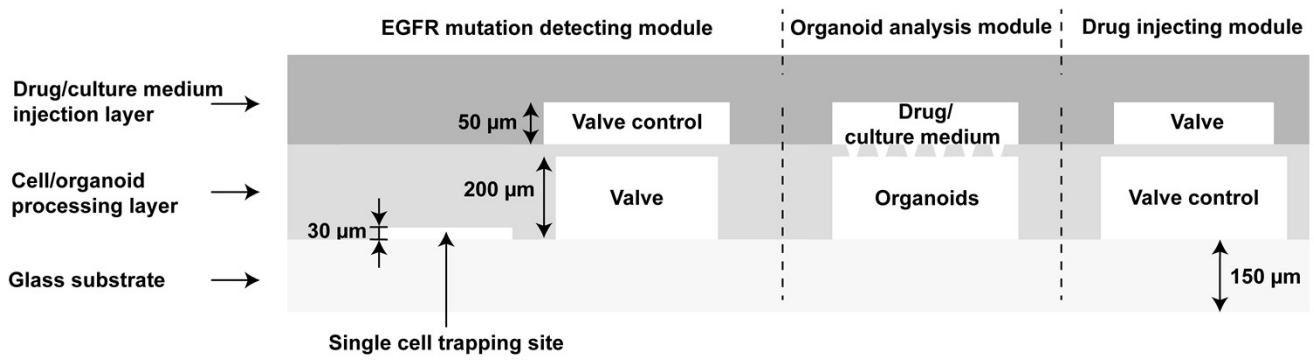

**Fig. S2.** The valve structure and vertical dimensions of RDMO-Chip. To fulfill the requirements of single cell trapping, the height of single cell trapping/staining channel is designed to 30 μm. To establish a sufficient space for organoid growth, the height of the organoid culture chamber is set to 200 μm. The height of the drug/culture medium channel is set to 50 μm. As there is no spatial overlap between valve area and function area for processing cells/organoids, no extra valve control layer is employed. In EGFR mutation detecting module, the valve control chambers locate at drug/culture medium injection layer. In organoid analysis module and drug injecting module, the valve control chambers locate at cell/organoid processing layer.

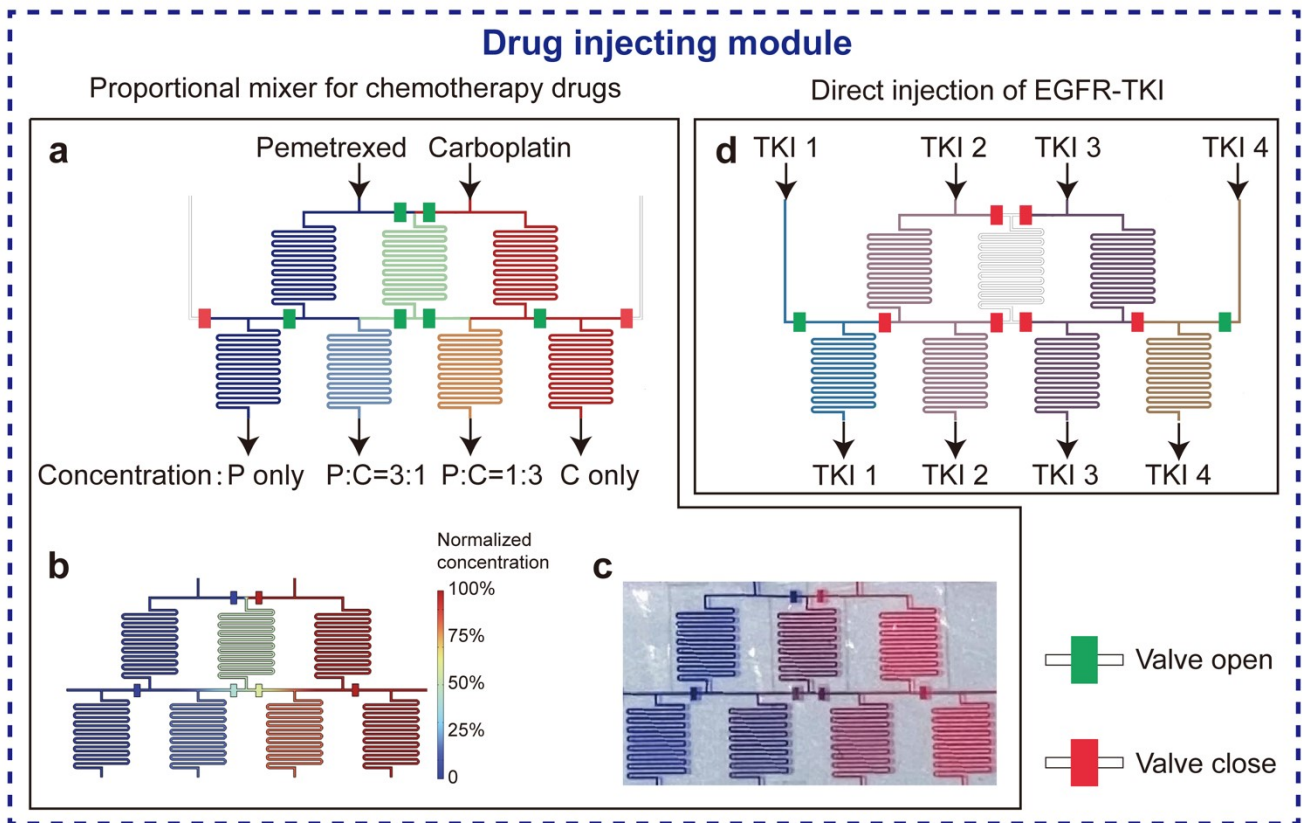

**Fig. S3.** The operations of drug injecting module. (a) The valve configuration of proportional mixer while administrating chemotherapy drugs. (b) The simulation of the mixing process of the proportional mixer. (c) The ink blending in the proportional mixer. (d) The valve configuration of proportional mixer while adding EGFR-TKIs. According to the latest NCCN guideline, EGFR-TKI should be used as a single agent while being considered as 1st-line medicine, no combined usage of different EGFR-TKIs is recommended. Under a configuration of proportional mixer while administrating chemotherapy drugs, pemetrexed and carboplatin were applied on PDOs with 4 different concentration ratios, matching a frequently-used clinical combination of pemetrexed and carboplatin; Under a configuration of proportional mixer while adding EGFR-TKIs, 4 kinds of EGFR-TKIs were independently directed to 4 organoid culture channels without mixing. In this work, 18 organoid chambers were divided into 6 channels. PDOs in 2 channels were without adding anti-cancer drugs, acting as a control group. PDOs in the rest 4 channels were exposed to anti-cancer drugs, acting as experimental groups. The configuration of both organoid chambers and proportional mixer can be easily adjusted according to different requirements.

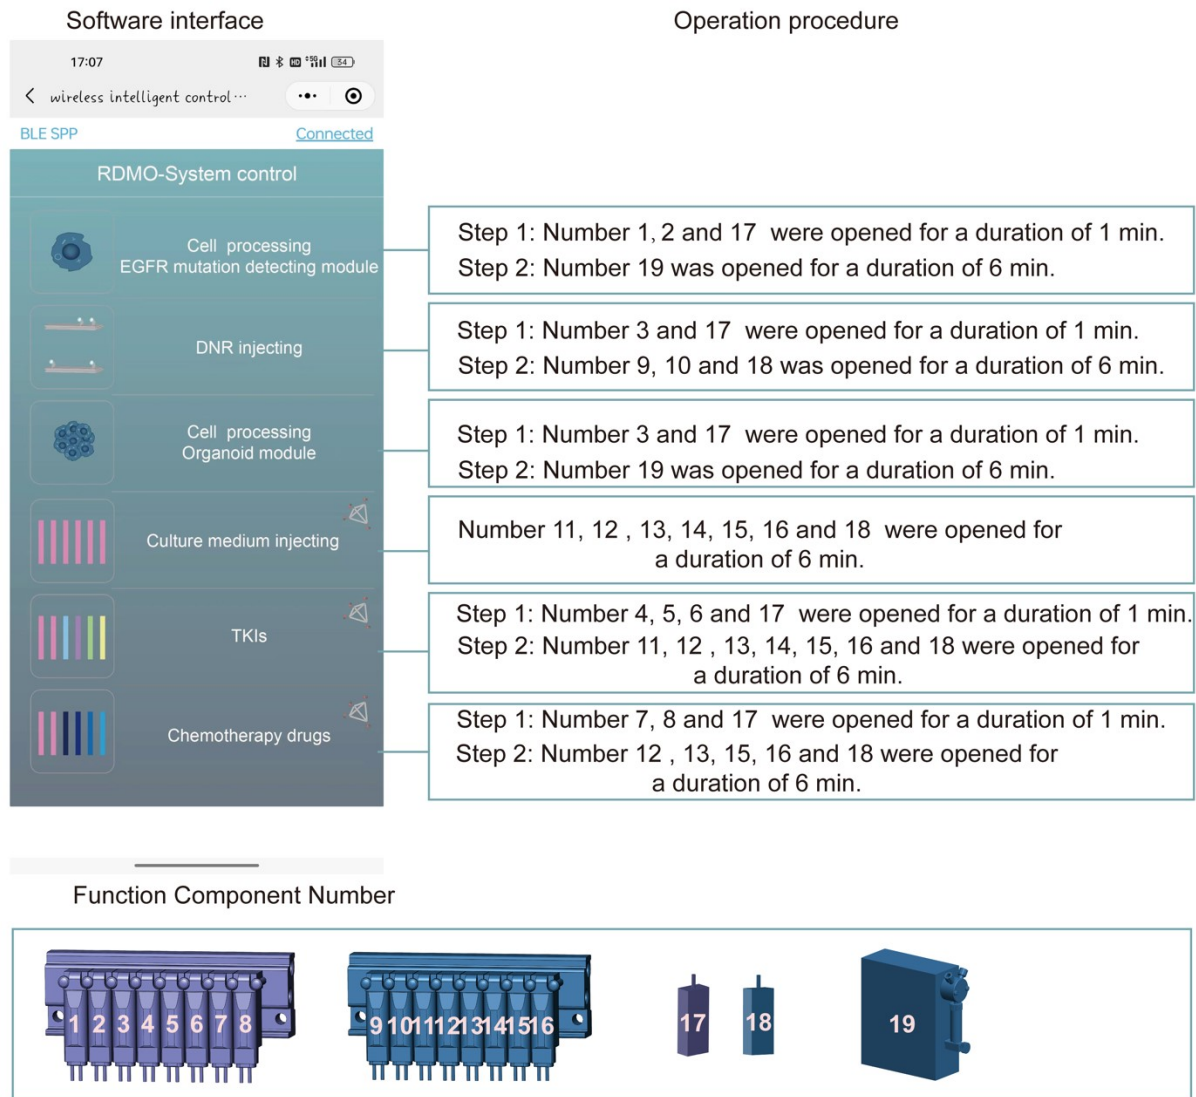

**Fig. S4.** Detailed operating procedures were initiated by using a specifically designed software running on a smartphone. The RDMO-System could be controlled using a specifically designed software running on a smartphone according to the therapeutic strategies and functional modes. The screenshot interface of the smartphone and operation procedure are displayed. No.1-8: eight-channel solenoid valves; No.9-16: eight-channel solenoid valves; No. 17/18: pressure pump; No. 19: control module. First, suspended cells dissociated from clinical samples were injected into the EDGR mutation detecting module for trapping single cell. Then, DNA-based nanorulers and cancer cells were simultaneously injected into the EDGR mutation detecting module and organoid analysis module, respectively, for cell staining of EGFR mutation detection and PDO culturing. EGFR mutation detection was accomplished during PDO culture. Finally, based on the result of EGFR mutation detection, PDO-based drug response test and monitoring were performed.



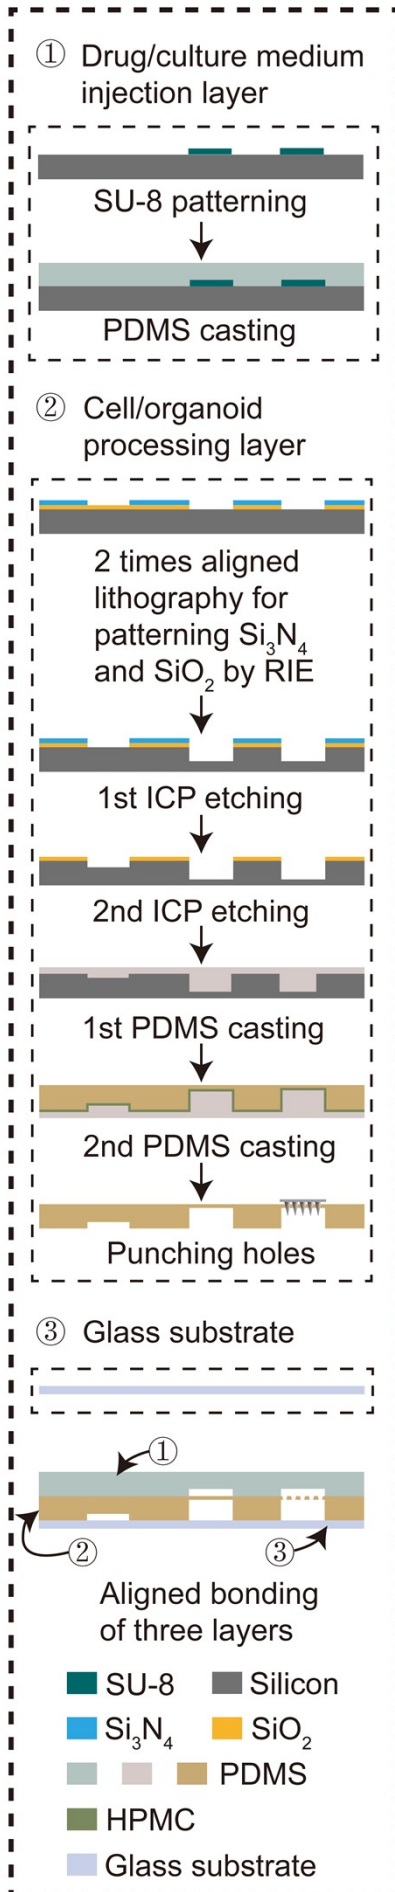

**Fig. S5.** The fabrication process of RDMO-Chip.

Briefly, 2 polydimethylsiloxane (PDMS) layers were separately fabricated and sequentially bonded to a glass substrate with alignment to form RDMO-Chip. The drug/culture medium injection layer was fabricated by casting PDMS onto a SU-8 mold which was coated and patterned on a 4-inch silicon wafer. The cell/organoid processing layer was formed by 2 times of PDMS casting. A silicon mold was fabricated by 2 times of inductively coupled plasma (dry) etching. As single cell processing and organoid culturing required different heights of microfluidic chambers, a  $\text{SiO}_2/\text{Si}_3\text{N}_4$  mask for inductively coupled plasma (ICP) etching was formed by 2 times lithography with alignment and reactive ion etching (RIE).

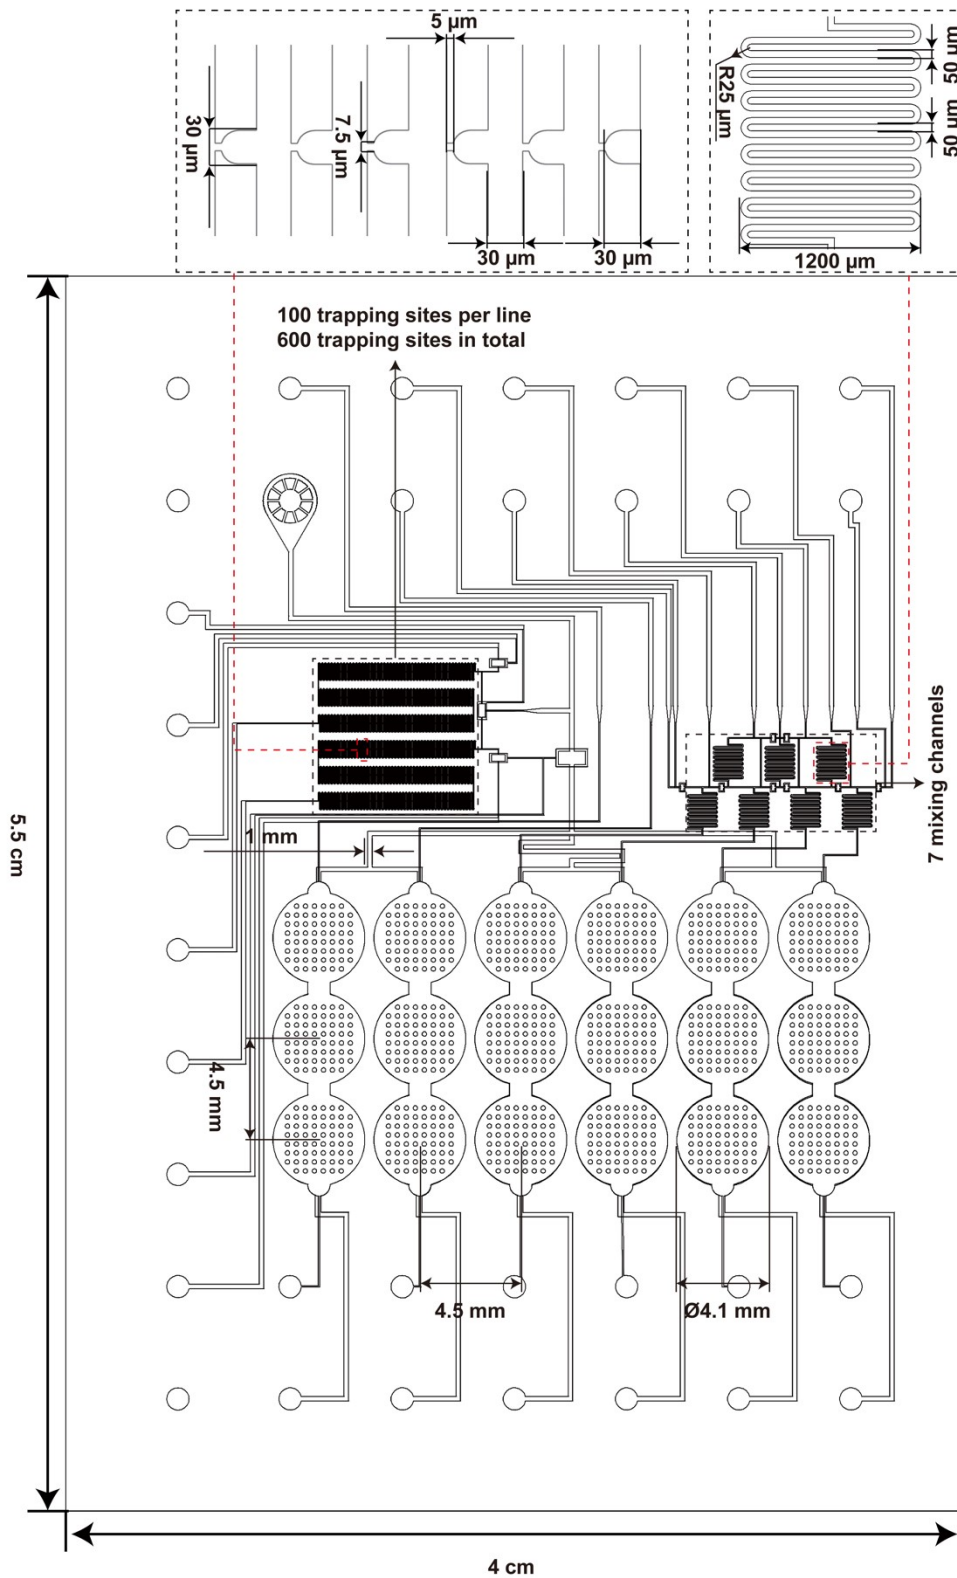

**Fig. S6.** Dimensions of RDMO-Chip. The dimensions of RDMO-Chip are marked on an overlapped layout. The single cell tapping channel is with 600 trapping sites (6 lines, 100 trapping sites per line). Upper left enlarged figure shows 6 single cell trapping sites with dimensioning. The proportional mixer consists of 7 identical mixing channels. Upper right enlarged figure shows a mixing channel with dimensioning.

**Fig. S7.** Route design of the three-layered rectangular structure. The M13mp18 scaffold ssDNA (blue) is folded into the three-layered rectangular structure by massive staple strands. The 9 special staple strands extended by polyA for connecting EGF molecules are designed on the three-layered rectangular structure. For EGFR-DNR-25, the distance between purple and green special strands is 72 bp $\approx$ 25 nm. For EGFR-DNR-100, the distance between purple and red special strands is 296 bp $\approx$ 100 nm.

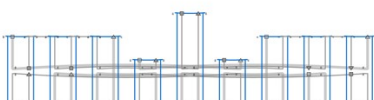



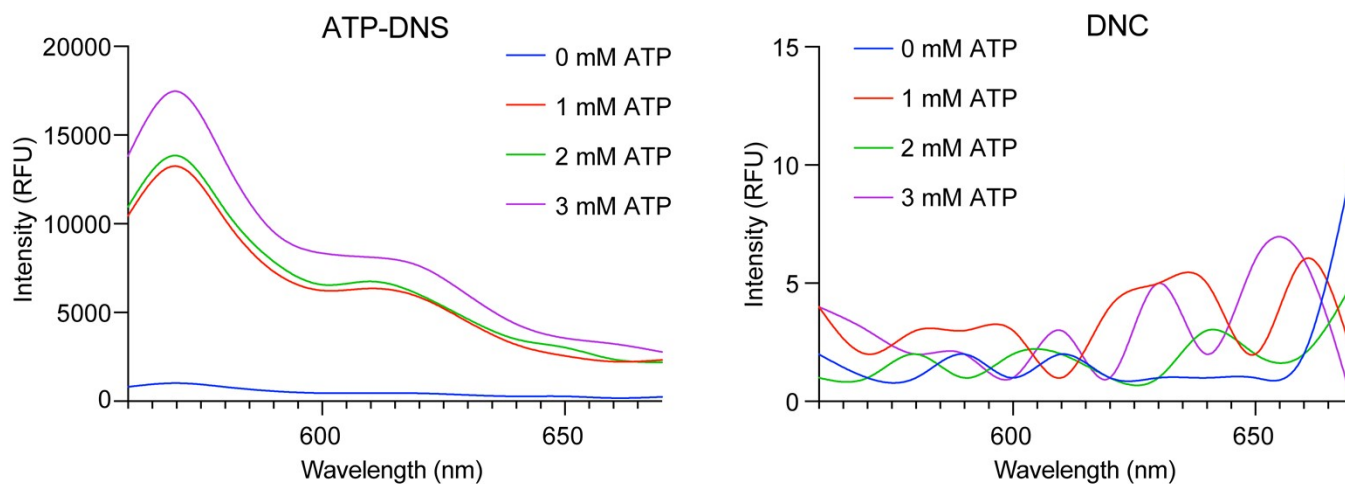

**Fig. S8.** Diverse fluorescence spectra of ATP-DNS and DNC to the response of ATP. Followed by the addition of 1-3 mM ATP respectively, sequential increases in fluorescence intensity of ATP-DNS are observed on 570 nm emission wavelength while DNC shows irregular fluorescence spectra. In addition, the fluorescence spectra of ATP-DNS and DNC show irregularity without ATP (0 mM ATP). These results demonstrate that ATP-DNS is sensitive to the response of ATP. The value of the fluorescence intensity of ATP-DNS excited is enhanced with the increase of ATP. As a negative control, DNC is incapable of responding to ATP.

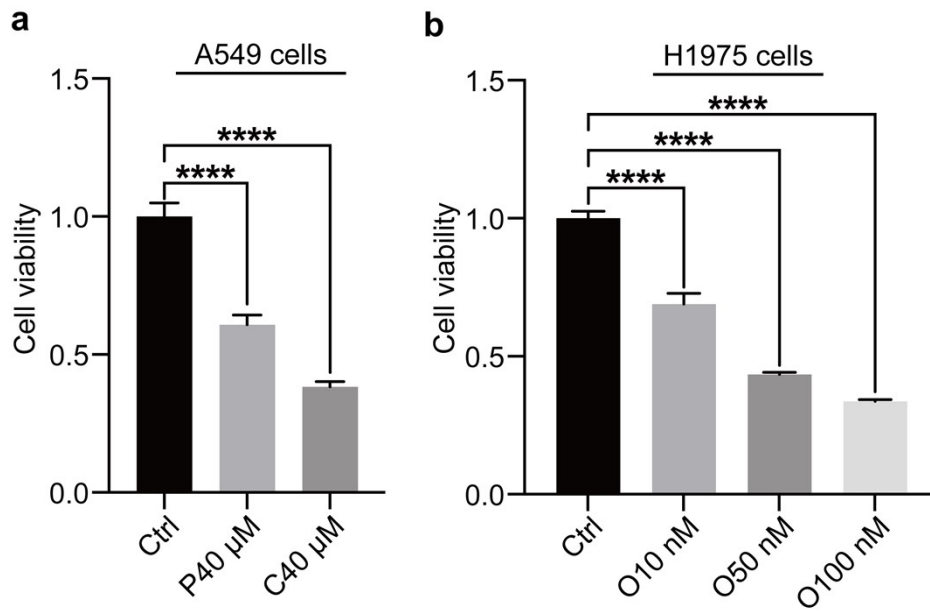

**Fig. S9.** The cell viability data of A549 and H1975 cells treated with diverse drugs. (a) The cell viability of A549 cells detected by CCK-8 under the 40  $\mu\text{M}$  of pemetrexed (showed P) or carboplatin (showed C) at hour 48. (b) The cell viability of H1975 cells detected by CCK-8 under the different concentrations of osimertinib (showed O) at hour 48. The results illustrate that cell viability is changing with the treatment of the drug types or concentrations, showing similar consistency with the variation of ATP detected by ATP detection kits and ATP-DNS.

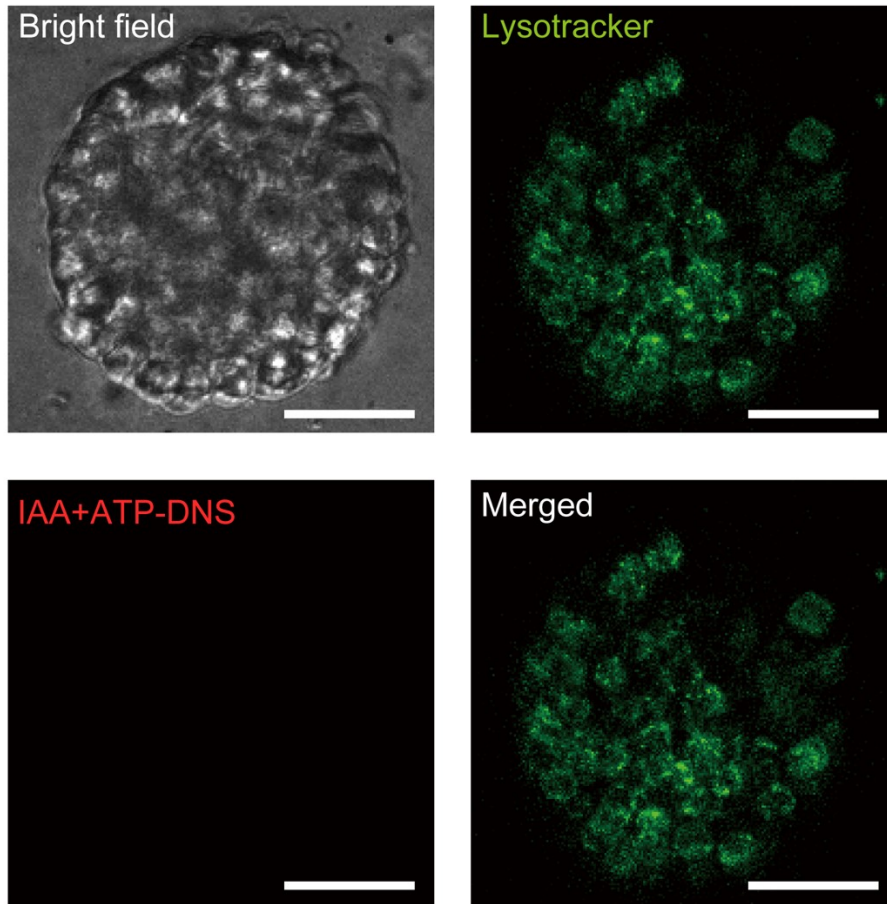

**Fig. S10.** Fluorescent images of PDOs treated with IAA+ATP-DNS (colored red) and stained with Lyso-Tracker (colored green). Before being treated with ATP-DNS, PDOs were pretreated with IAA (100  $\mu$ M) for 4 h to decrease ATP generation. The intracellular locations were stained by Lyso-Tracker. Confocal images show that no red fluorescent signal was excited, demonstrating that ATP-DNS has high specificity for recognizing ATP. Scale bars: 50  $\mu$ m.

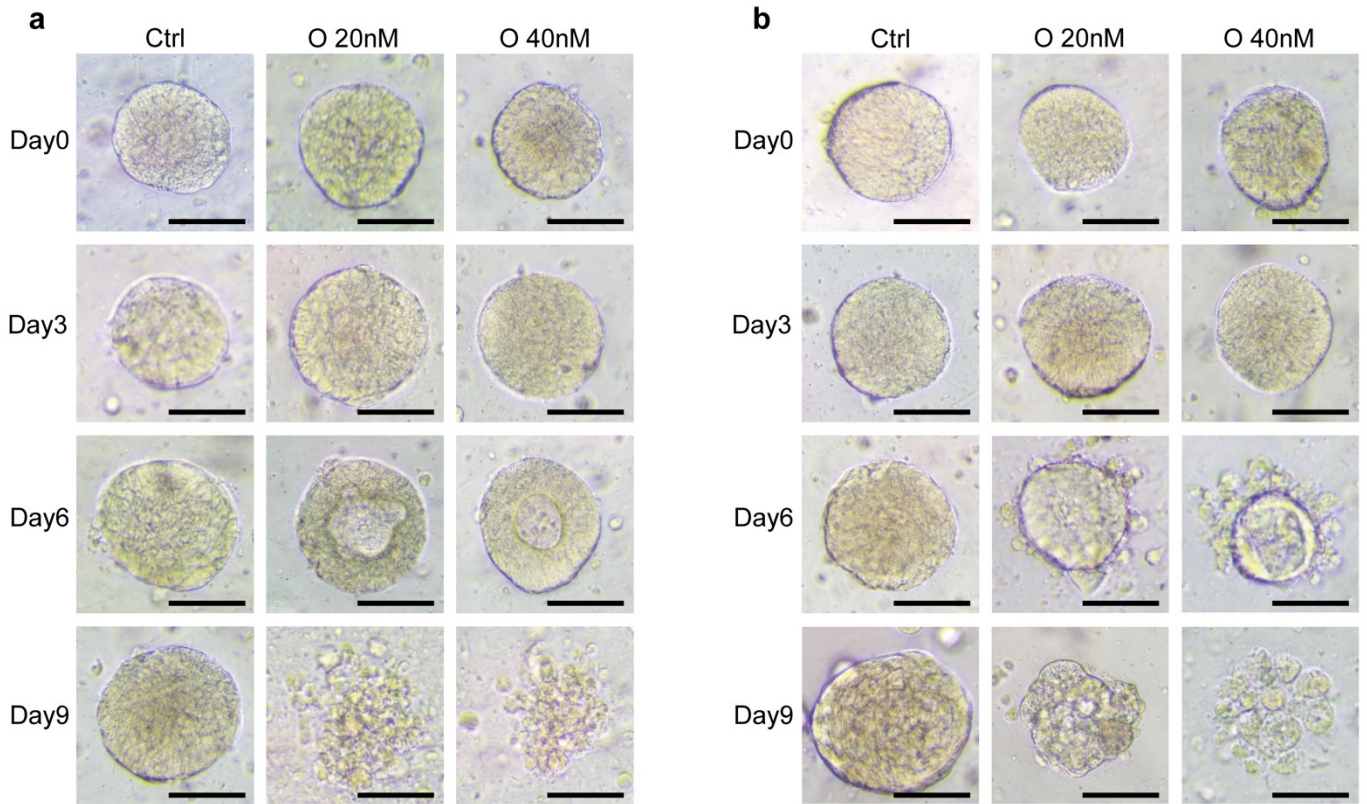

**Fig. S11.** The morphology of the PDOs treated by osimertinib. Organoids derived from (a) clinical sample 1 and (b) clinical sample 2 treated with osimertinib (20 nM) and osimertinib (40 nM) for 9 days. These bright images were captured every 3 days. The results illustrate that the PDOs from 2 clinical samples were inhibited with the increasing days, and showed no observable difference between groups treated with osimertinib (20 nM) and osimertinib (40 nM). O 20nM, osimertinib (20 nM). O 40nM, osimertinib (40 nM). Scale bars: 50 μm.

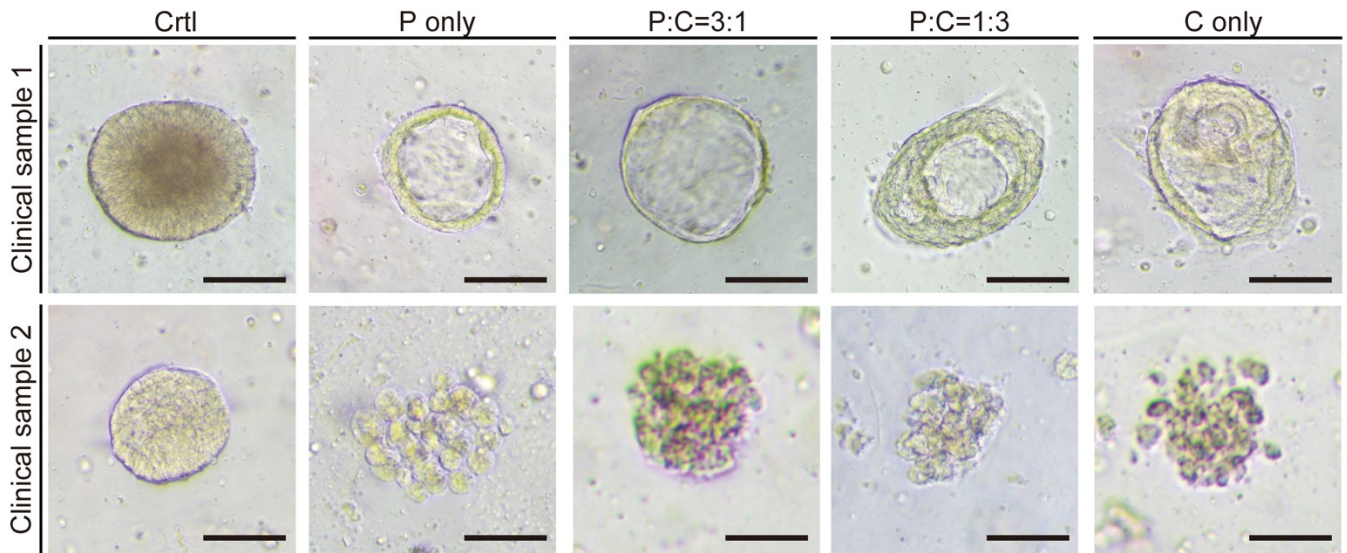

**Fig. S12.** The morphology of the PDOs treated by chemotherapy drugs. Organoids derived from 2 clinical samples were treated with different combinations of pemetrexed and carboplatin. These bright images were captured at day 6. The images demonstrate that there is no observable difference among these diverse chemotherapy treatments. P only, pemetrexed at 16  $\mu$ M. P:C=3:1, pemetrexed at 12  $\mu$ M and carboplatin at 4  $\mu$ M. P:C=1:3, pemetrexed at 4  $\mu$ M and carboplatin at 12  $\mu$ M. C only, carboplatin at 16  $\mu$ M. Scale bars: 50  $\mu$ m.



**Table S1.** Detailed sequences of EGFR-DNR.

| Staple strands | Sequence (5'-3')                                           |
|----------------|------------------------------------------------------------|
| Strand 1       | AACGGGTATTAAACCAAGTACAAATAATACGTTAAATTGTAGCGGGAGCACGTATAAC |
| Strand 2       | TTGTAGCGTAAATGCTTTAAATATTCCAGGAAGAAAT                      |
| Strand 3       | CGGAACGAGGGTACAACCTTCTGTTTAGAAAAAATCAGGTCACGTATCGATGA      |
| Strand 4       | CGGAGTGAGAATACAGCAGCGGCTCATTAAATCATTAGCGGGAGAGGCGGTT       |
| Strand 5       | GATGATACAGGAGTGTCAAATGGTAGTTTGACCTATCAGGTGC                |
| Strand 6       | TGCGTATTTCTGTGTAGGACGTTTTTTGCAACAACATAAAAACCCATG           |
| Strand 7       | TAATTGCGTTGCGAACGAGTA                                      |
| Strand 8       | CCGATAGTTGCGCATCAGCTTGCCAAAAGAAGCAAACGGAACGCCAATTCGCA      |
| Strand 9       | CCACCCTCAGAGCCACATAGATAAAAATACCAATCACACACGACCAGTA          |
| Strand 10      | CAGTATTAACACCGCCACAGAGGTTCTGATTATTAATTTTACCAGAAAAGTAAGCA   |
| Strand 11      | CGGTCCACAAAACGACACATTCAACTAATCTAACAGCTTGAG                 |
| Strand 12      | CAAAGGGCCCTAAAGGTAGGGCTTTTTATCAAAAATAGCACCCAAAAG           |
| Strand 13      | AGCAATACTCCATCACGATAGCTTATGTAATTATCAAGATTTGCGGGAGGTTTTGA   |
| Strand 14      | TGAATCTTACCAAAAACAATGAATCATAGTCAATATAACTCAAACAAAACATC      |
| Strand 15      | GAATTTCTTAACATAAAAACAGTTAATTTTACAGAGGCGCAGATTCACCAGTGCT    |
| Strand 16      | TAGGGTTGGGAAGAAAAAGCCTGCTATATGTCTAATATCATAACATAA           |
| Strand 17      | AGAGCCTAATTTGAGAATTGATCCGGCTTAATTACCTGAACAATATATTAGTC      |
| Strand 18      | CACCAGTGAGCTCGAAAACGAACTAGACGACGACGTTGAACCCTCATT           |
| Strand 19      | AGAACAAGCAAGCCGTTTTTATTTATCAACTAGAAAGCGAAAGGCAGAGCGGGAGCT  |
| Strand 20      | ATAAAAGGACAACCTAAAGGATTTAGAAGTATTGCCACCCTAAAGGGCG          |
| Strand 21      | AAACAGGATGCAATGCGGCAAAGAATTAGCAACAGGTCAGGCGGGGTT           |
| Strand 22      | ACCCTTCTGAAGGTTATCGACAACCTCGTATTAGAGCCACCAGGTAAT           |
| Strand 23      | AGGAAACGAGGCCGGATATACTTCTTATCAGATGCCACGCTGAGAGCC           |
| Strand 24      | AAAACACTCATCTTTGACCCCAACCGGATTACCAGTCGAAATTGTCATTGAGGCTGCG |
| Strand 25      | AAGTCAGAGGGTACCCAATCCATCATAATCAATAGATAAAGAATAGCCCGAGA      |
| Strand 26      | TGACAGGAGGTTGAGGAATTAAGCGGCTTAGATAAGCAAAGCCAGCTT           |
| Strand 27      | TGTACCCCCAAAAGGGTAGCATTAAACATCCAACAAATAAAGCTGAGAC          |
| Strand 28      | GCCATTAAATGAAAAAGCGGAATTATCATCATTTAGCGTCACCATTAC           |
| Strand 29      | GGATTTTGCTAAAGCAACGGCTTGTGAATTCATTCAGCGTGCCAGCTGCATTA      |
| Strand 30      | GCGCATCGGCTGTCTTTCTTAGAAACCAGGTTTGAACCGCCGCGCTTAACAC       |
| Strand 31      | GGAATCATTACCGCGCCCAATACAACATGTTATACAACGGCGAACGGGATTTTAGACA |
| Strand 32      | AGTCCACTGGGAAAGCATTCTTACTTTTAACCGTTAAGCCTTACGACG           |
| Strand 33      | AGGTGGCAAATTATTCGTCAGATGCCCGAACAATCAACAGTTGAAAG            |
| Strand 34      | TACCGTTCAGTAAGCCATTTGGGGTTGATTCACAAGAGATGGTGTAG            |

|           |                                                           |
|-----------|-----------------------------------------------------------|
| Strand 35 | AGGCTTGCAGGGAATTTTTTCATAAAAACAGAGGAAGTGAGCGAGAGCCCCAA     |
| Strand 36 | TCACCGCCGCAGGTCGGAAAGATTTAAGAGCAAGGAGCCTCACCTCA           |
| Strand 37 | TAATAAGAGCAAGCGCTAACGAGCCAACGATTCTGTACGTGGACTCCAACGT      |
| Strand 38 | TCTGAAACCACTGAGTATTATAGTTTGCCAGACCATTGCTATCCGCT           |
| Strand 39 | CGCCTCCCTCAGAGCCAGACTTTAAGAAACAAGGCCAACATCTGAAAT          |
| Strand 40 | AGAATCAAGTTTGCCTATTCTGATGAATAATAACGAACCAACATCAC           |
| Strand 41 | TATGTTAGACCGACTTAATAAAGAAACATTATCAAACCCTCAATCAAT          |
| Strand 42 | TTGTAAACTAAAAATTCTCAGAGCATAAAGCTGAGCCGCCGCCGTCGA          |
| Strand 43 | GAGGGTTGCCACCCTCCAGACCGGGAATTACGGCGATTAACCAAGCTT          |
| Strand 44 | ACGGTAATTCACCATCTGAAAAGGTGGCATCAGCGCAGTCCCTATTAT          |
| Strand 45 | AGAGTCTGTTCTTTGACGCTATTAGTTTGGATAACGTACGTAGCGAC           |
| Strand 46 | CCATCGATAACAAAGTTCCTTAGAATCC                              |
| Strand 47 | AACCTAAAACGAAAGAGGCCAAAAGCTGCTACCTTATATACGAGCTGGTGCCGAAAC |
| Strand 48 | ACTACAACCCTGCCTAATATAACAGCGCGAGCAATATGATATTCAACC          |
| Strand 49 | TGTCGTCTTTCCAGACGT                                        |
| Strand 50 | TAGACGGGAGAATACGTCAAAAAATAAGGTCCCATCCGTTCCGAAATCGGCAA     |
| Strand 51 | TTCAGGGAAGAAGGATTAATGCTGACAGGCAACTGAGTAATGTGTAGG          |
| Strand 52 | CAGCCTTTACAGAGAGAATAAAATTTAATATCAATAAGCCCCAGCAGGCGAAA     |
| Strand 53 | ACAGTATCGGCCTATTGAATCGTAAATTGTGAGGAAGTTTCC                |
| Strand 54 | CAGTCGGGAAAGCCTGATTTCAACACTGCGGATTTTCTGTAGACAGCC          |
| Strand 55 | CGCCCACGCATAAGCTCCAAAACACTATCTTTAATTCTTCTGTATATTTAAA      |
| Strand 56 | ATTAACGGGTAAAATACGTA                                      |
| Strand 57 | TAGCTTTTTCAGGCTTGAGAACACCAGCTCACTGCCCGCTTTC               |
| Strand 58 | ACATTTGACTGGTAATAAGT                                      |
| Strand 59 | TTAAATTTTTGCGGGAAAACATTATGACCCTGCACCCTCAGAATAGGT          |
| Strand 60 | TGAGGACTAAAGATAAATGAAATCGTCATAACAGTTCCGTGCATCTCATTGCC     |
| Strand 61 | ACATTCAATAAGTTTATACCTGAGGAAAACCTGCTTTGACTCACGCTG          |
| Strand 62 | AGAAAATTCATATTCAAAATCGCGCATCTTCTAGTTGCGCCGCTACAGGGCGC     |
| Strand 63 | TCACCGTCCAAACGTATTCATTTGAGGTTGGGCGATTAAGTGGCGAG           |
| Strand 64 | GAGTGAGCTAACTCACAT                                        |
| Strand 65 | CCATATTATTTATATTGAGCGAAATGCTGACAAAATTTAAACGCTAATACGTG     |
| Strand 66 | AGATCTACAAAGGCATTAGATCCCCTCAACGATCTAAAGTTT                |
| Strand 67 | ATTTTGCAAGCCCTTACGCTGAGTAAATCGTTTAGTAATACCAGCAG           |
| Strand 68 | AGAGCCAGTGATTAAGTACATAAAGTCTGAGACCAGAATCGATTTAGA          |
| Strand 69 | TCCTCAAGTAGCAAGCAAAGATTACAAAATAGAAGGGCGACATGGTCA          |

|            |                                                            |
|------------|------------------------------------------------------------|
| Strand 70  | TACCGTAAATGAAAGTAACTAAAGAATAGTAGTGAGAAAGGCCGGAGA           |
| Strand 71  | TTTAACGGGGTCAGTGCC                                         |
| Strand 72  | CAGATATAGAAGGCTTATCCGGTAAAGTACTCAACAGGAGCCCCCTGAGAAGTGTTT  |
| Strand 73  | AAAATCACCGGAACCAAATCCTTTGAATATACAGCGTAAGCATGGAAA           |
| Strand 74  | ATTGACGGACATATAATCAAGAAAATGCAAATGTTAGAATAGCGGGCG           |
| Strand 75  | GAGATAACCCACACCAGTTACCATATGCGTTCAGCTATCCAGTTTGAACAAG       |
| Strand 76  | AACTGGCACAAAATCAACCATATCCAGAAGGATCTAAAGCATCACCTT           |
| Strand 77  | GGATCGTCACCCTGAAAGGAAAAGAAGTTCAGAAGCAGGAACAAACAATCATA      |
| Strand 78  | ATGAATCGCACACAACGCGATTTTTAGTAAAAAACAGTTTCAGTACAA           |
| Strand 79  | CAGTTTGAGGGGACGACG                                         |
| Strand 80  | CATTAGCACAATAATATGCTTCTGAAGAGTCAGAGGCCACAGCACTAA           |
| Strand 81  | AGGAACCAATATCCAACAGGTCAGACACCGTACTCGGT                     |
| Strand 82  | TGAGAGTCTGATAAATTGTTTAGCTATATTTTGCATACATAAACAGT            |
| Strand 83  | TATCATCGCCTGATAAATTGTGATGAACGTACAGGTAACCTAGAGGCCGAAAGGGGGA |
| Strand 84  | ATTGTATCGGTTTCGACAATGGAGATTTAACTGACCAAGAGAGTTGCAGCAAG      |
| Strand 85  | CCAAGCGCGAAACAAAGTACAGGCTGACCGTTAATAATTCGTAATTCGGTGCGGGCCT |
| Strand 86  | AATCCCTTCTGGCAAGAAGAATAAAAGACAAACACCTGACAAAGACA            |
| Strand 87  | AAAGCCAGAATGGAAAATTCTACTTACGGTGTTAGCATGTCGGCGGAT           |
| Strand 88  | ACGCGAGGCGTTTTAGCGAACAGTAATAAATTTAACATGCCGTAACGAGTAAA      |
| Strand 89  | TTGAAAACATAGCGCAAATTTAAATCAAG                              |
| Strand 90  | GTAGGTTTACCAGCGCTTGCTTTGTACATTTGTAGATTAGAGCCGTCA           |
| Strand 91  | CCACGGAACCGATTGAACATCGGGCAAACAATTCTAAAATATCTTTAG           |
| Strand 92  | GCTATCTTACCGACCCAGCTAATCGCCATGAGAATATGTCTATCATGGGCGAT      |
| Strand 93  | TAATGCCCGCCTGTAGCATAAATCCTGGATAGACCGCTTCCGGAAGCA           |
| Strand 94  | CTCCAAAAAAGCCGATATAAACATTATGTGTACAGAACAGCTGATTGCCCT        |
| Strand 95  | ATCCTGTTACCACACATACCGACATATTTTAGGGAAGCGCAATCAAT            |
| Strand 96  | TTGCTCAGACCCTCAGTATCGCGTATAACCCTCGCCAGCTGGATCCCC           |
| Strand 97  | GGCCCACTGGTCGAGGACGCCAACAGATTAAGTTAAGAAAGGAAACCG           |
| Strand 98  | CCCTTATTAGCGTTTGGTTTGAGTAATTGCGTTGAATGGCTTACCGCC           |
| Strand 99  | ATTGCGAATAATAGTTAAAGGAAATCTACTTCATCAAGGGTGGTTTTTCTTTT      |
| Strand 100 | GAACCGCCTACCAGGCTTGCGGATAATAAAGCTTTAGAACCCTCATAT           |
| Strand 101 | TAAGAGGCGGTACCGTTGT                                        |
| Strand 102 | GATTTTTTGTATAACTGAAGAACGCGACAAAAGAACTCAATCGGAGATAGA        |
| Strand 103 | CCGCCACCAGAACCACCACCAAATCGGTGCTCCTTTTTTGTAAATCAAAAA        |
| Strand 104 | ATGCCACTTGACGAGAATGGTTTAGGGTGCCTTCGCACTCCAGCC              |

|            |                                                                |
|------------|----------------------------------------------------------------|
| Strand 105 | GAGAGGGTAGCTATTTTTGAG                                          |
| Strand 106 | CTCATAGTAGTAACAGGTAGATTTCAATAACCTAATGCCG                       |
| Strand 107 | CCTTGATATTCACAAATAAATCATTAGCTCAAATCAGAAATAACAACC               |
| Strand 108 | AAGATAAATGCAACAGTGATGGCAATTCATCACGTAATCACAATGAAA               |
| Strand 109 | TTTTTTGGACGTGAACGAGGCATTTTCGAGCCCTCCCGACTAGTTGCT               |
| Strand 110 | TTTAATGCTCAAATATCATTTTTGCGGAACAAAATTTTCGGTGGGAATT              |
| Strand 111 | AGGTTTAGTACCGATATAAGTCTTTAATTTGTACCAAGAAGCCTTTATTTCAA          |
| Strand 112 | GCGCGTTTTCATCGGCGAAACCACAAAATTATATAGCCCTTATCGGCC               |
| Strand 113 | GATAGCCGAGCCTTAATAG                                            |
| Strand 114 | CGACCTGCTCCATGTTACTTAGGAACCGAGGAATACCGGCCAGTGGTTGGGTAACGC<br>C |
| Strand 115 | GCACAGACAGTTGGCAGTTATTAATTTTAAAACCATCTTTGTGAATTA               |
| Strand 116 | GCTTGACGATTAAGACAGACGACGACAATAAAGCAAGCATCC                     |
| Strand 117 | GAGCACTAGACATTCTTAACGGATATTTCAATTTTTGTACAT                     |
| Strand 118 | CGCAAGGAGTTAATATTGATAAGAAAGCGAACAGAACCGCTTA                    |
| Strand 119 | CGTCGGATCTGTTGGGCGAGAGGCGGGAAGAACCGCTTTTATA                    |
| Strand 120 | GGATTATTCTATGGTTTTTCAAATCGTGTGATAATGAAAAAAG                    |
| Strand 121 | TAATTCGCGCTGCAAGAGGCATAGCATCAGTTACAACAACCCG                    |
| Strand 122 | GCATGCCTTGGCCCTGACTTTGAAAGAGGACAGTCGAAATCAT                    |
| Strand 123 | ATGGGCGCTTTCCGGCCGTCCAATTTAATCATACAGAGGACC                     |
| Strand 124 | TAAAGATTGGTTGATACATGTTTTTGCATCAACCAATAGGGGA                    |
| Strand 125 | TACCTACACTTTCCTCCCAATCGCACACCGGAAAATAAGATCG                    |
| Strand 126 | TTGCTGGTACGGTACGGACTACCTCAGTATAAAGCGTCTTAAT                    |
| Strand 127 | GCTGAACCGCGAACTGTTGCACGTGGAAACAGACTCCTTACAA                    |
| Strand 128 | CTAGGGCGATAAATCAAAGTCTGAACAAGAACGCACTCAAAC                     |
| Strand 129 | TAAAGTGTAACCTGTTGAATAAGGCTTGCCACGAAGGCCTT                      |
| Strand 130 | CGCGTAACTGATGGTGTAAATTTACGAGCATGTATCATTCCCTAG                  |
| Strand 131 | TAGCTGTTGGGCGCCAGAGTAATCTTGACAAGCAGCGATTGCG                    |
| Strand 132 | GTTCTAGCTGGAGCAACCAATTCTAGAATGACCATTCCACATG                    |
| Strand 133 | GAATTGAGGACCTGAAAGTAACAGAACAACAAAGAAACGACA                     |
| Strand 134 | AAACAACAGGAAATTACATAGGTTTAAACATTAAGTCATAATC                    |
| Strand 135 | AGCATCGTAACAGAAAACGGCGAACGATGCCCGTATGGCTTTT                    |
| Strand 136 | CTTATTAATGCCCCGAAAGGCTGAATATAGGATTAACGATTGG                    |
| Strand 137 | TTAGTAGAAGATGTGAGTGTAGAACCTCCAGTAGCAGACTGTA                    |
| Strand 138 | CAATCTCCGTGAAGCGGATAAATATGCATTAAGAGTCCTCATT                    |
| Strand 139 | GGAAATATCCATTTTTAATAAAACAGAGAGCCATTTTCATAGCC                   |

|                           |                                                              |
|---------------------------|--------------------------------------------------------------|
| Strand 140                | GTGTTTTGACGGATGATGATACCTTTTGGGAGGGAACCGGAAC                  |
| Strand 141                | CAGATGGGATAGGTCTTTATTCATTCCTTTCCGGAATCTGAATT                 |
| Strand 142                | GTATACATTGGAATTATTCTCGCCTGACAAAGACACAGAACCG                  |
| Strand 143                | TGTGTCTGGCCGAGCTTCAGGTCATTTGGATAAGTGCCAGCAT                  |
| Strand 144                | TAATACTTTTGTAAAGTTGATTAGAGAGTACATAGCCCGGAG                   |
| Strand 145                | CATTTTTTGTTCCTCCGACGCAGATACATAACGCTTTTCAAGG                  |
| Strand 146                | GACGTTGTGCTGGTTTGACGGTCAATCATAAGGCCGGAACATA                  |
| Strand 147                | ATTTTAAAAGATTGTAGCTTAATTACTTCAAAGCCACCAAAT                   |
| Strand 148                | TCATCAACCGCTATTACGTTTACCAACGGAACCTTCGGTCGTTG                 |
| Strand 149                | GGGTACCGAGACGGGCACCAGGCGCATAGGCTACGGAGATCTG                  |
| 0 nm special strand 1     | AGCAGCAAAAATACCGGGAAGGGTAATAACCTACGGAATAATA                  |
| 0 nm special strand 2     | TTGCCTGATAATCAGTATAGTGAAAATTGAGACAATTTTAAGA                  |
| 0 nm special strand 3     | ATCGGAACGAAAAACCAAAGTACCGACAAAAGGTATTCTATCC                  |
| 0 nm-A special strand 1   | AAAAAAAAAAAAAAAAAGCAGCAAAAATACCGGGAAGGGTAATAACCTACGGAATAATA  |
| 0 nm-A special strand 2   | AAAAAAAAAAAAAAAAATTGCCTGATAATCAGTATAGTGAAAATTGAGACAATTTTAAGA |
| 0 nm-A special strand 3   | AAAAAAAAAAAAAAAAATCGGAACGAAAAACCAAAGTACCGACAAAAGGTATTCTATCC  |
| 25 nm special strand 1    | ATCTGGTCAATATTTTAGATTTTCTTAACAATGAAAATACAGA                  |
| 25 nm special strand 2    | AGCCATTGCAGGAGGCTTATATAATTTAGTATAAAATAAAGTA                  |
| 25 nm special strand 3    | AAAGGAAGAGTGTTGTATGCAGAACGCGCCTGTTTTCATCCAG                  |
| 25 nm-A special strand 1  | AAAAAAAAAAAAAAAAATCTGGTCAATATTTTAGATTTTCTTAACAATGAAAATACAGA  |
| 25 nm-A special strand 2  | AAAAAAAAAAAAAAAAAGCCATTGCAGGAGGCTTATATAATTTAGTATAAAATAAAGTA  |
| 25 nm-A special strand 3  | AAAAAAAAAAAAAAAAAAGGAAGAGTGTTGTATGCAGAACGCGCCTGTTTTCATCCAG   |
| 100 nm special strand 1   | CAGTCAAACGTAAAACCTGGAAGTCCCTGACTTTCGTCACCAG                  |
| 100 nm special strand 2   | TGACCGTAGCAAAGCGGGGGTAAAAGAACTGAAAGACAGACT                   |
| 100 nm special strand 3   | CACAATTCGCCAACGCCCAAATCAACGTAACAAGAATACCAT                   |
| 100 nm-A special strand 1 | AAAAAAAAAAAAAAAAACAGTCAAACGTAAAACCTGGAAGTCCCTGACTTTCGTCACCAG |
| 100 nm-A special strand 2 | AAAAAAAAAAAAAAAAATGACCGTAGCAAAGCGGGGGTAAAAGAACTGAAAGACAGACT  |
| 100 nm-A special strand 3 | AAAAAAAAAAAAAAAAACACAATTCGCCAACGCCCAAATCAACGTAACAAGAATACCAT  |
| PolyT                     | TTTTTTTTTTTTTT-SH-C6                                         |



**Table S2.** Detailed sequences of ATP-DNS.

| Strands                          | Sequence (5'-3')                                                                               |
|----------------------------------|------------------------------------------------------------------------------------------------|
| CY3-modified ATP aptamer strands | CY3-CAGTCACCTGGGGGAGTATTGCGGAGGAAGGTAAAAAAAAAAAAAAAAA                                          |
| BHQ2-modified short strands      | CCCAGGTGACTG-BHQ2                                                                              |
| BHQ2-modified long strands       | GCAATACTCCCCCAGGTGACTG-BHQ2                                                                    |
| ssDNA1                           | TTTTTTTTTTTTTTAAT ACA TTC CTA AGT CTG AAACAT TAC AGC TTG CTA CAC<br>GAG AAG AGC CGC CAT AGT A  |
| ssDNA2                           | TTTTTTTTTTTTTTAAT TAT CAC CAG GCA GTT GAC AGT GTA GCA AGC TGT<br>AAT AGA TGC GAG GGT CCA ATA C |
| ssDNA3                           | TTTTTTTTTTTTTTTAA TCA ACT GCC TGG TGA TAA AAC GAC ACT ACG TGG<br>GAATCT ACT ATG GCG GCT CTT C  |
| ssDNA4                           | TTTTTTTTTTTTTTTAA TTC AGA CTT AGG AAT GTG CTT CCC ACG TAG TGT<br>CGT TTG TAT TGG ACC CTC GCA T |

A tetrahedral DNA framework was assembled with ssDNA1, ssDNA2, ssDNA3, and ssDNA4.

ATP-DNS was assembled with tetrahedral DNA framework and CY3-modified ATP aptamer strands linked with BHQ2-modified short strands.

DNC was assembled with tetrahedral DNA framework and CY3-modified ATP aptamer strands linked with BHQ2-modified long strands.
